# Supplementary material
Source: PubMed Central journal article supplement (PMC4091227)
Supplement: psb-8-e26601-s01.pdf [file psb-8-e26601-s01.pdf]

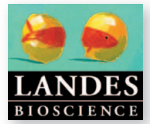

## **Supplemental Material to:**

**Seokhoon Park, Christof Rampitsch, Gavin D Humphreys,  
and Belay T Ayele\***

**Wheat seed proteins regulated by imbibition independent  
of dormancy status**

**Plant Signaling & Behavior 2013; 8(12)**

**<http://dx.doi.org/10.4161/psb.26601>**

**[www.landesbioscience.com/journals/psb/article/26601](http://www.landesbioscience.com/journals/psb/article/26601)**

**A)**

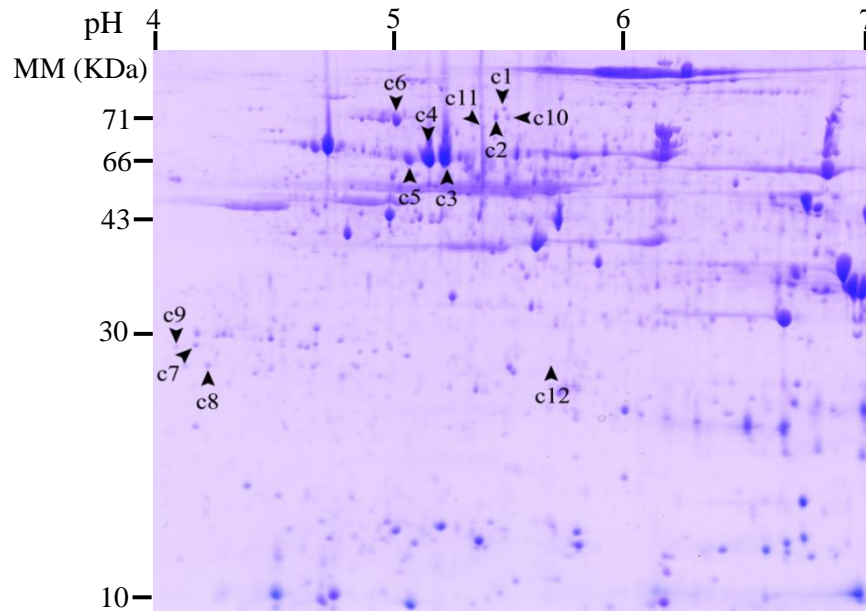

**B)**

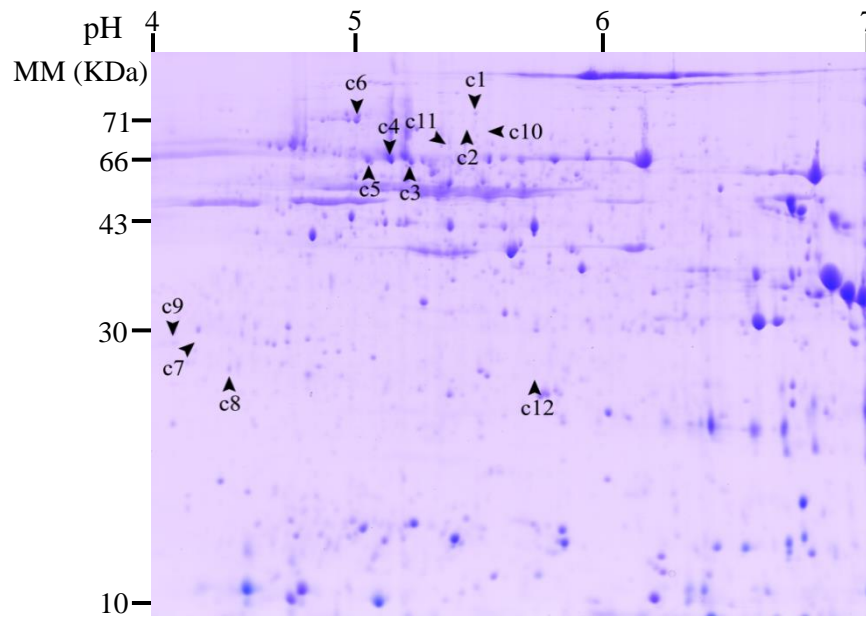

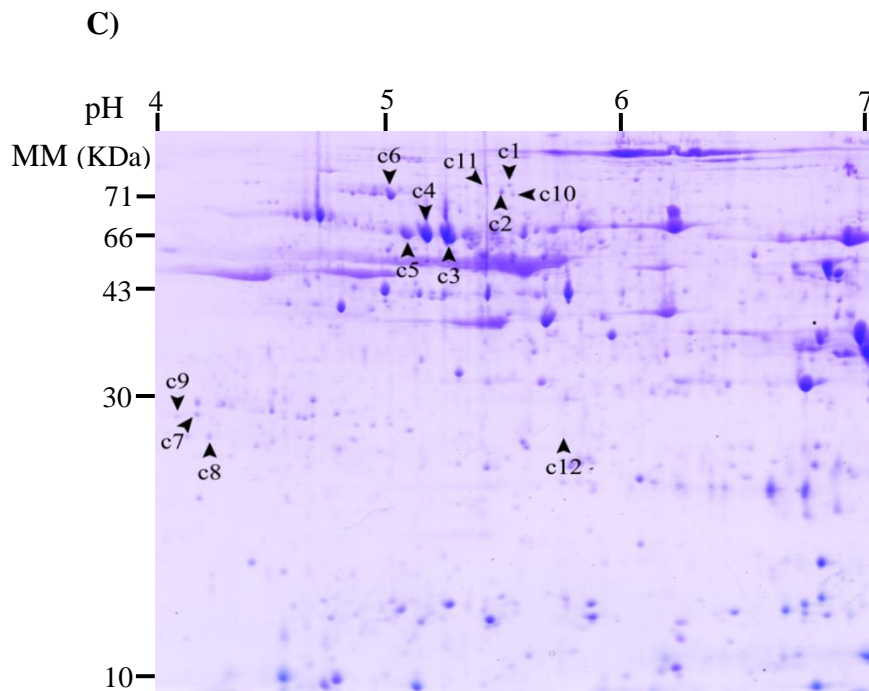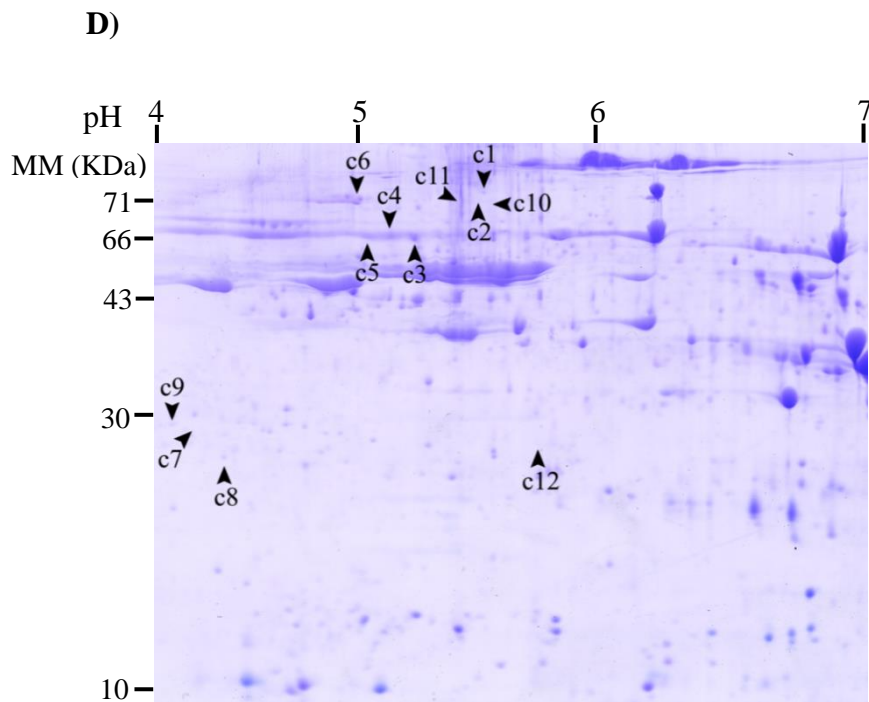

**Figure S1.** Two-dimensional gel of dry dormant (A), imbibed dormant (B), dry after-ripened (C) and imbibed after-ripened (D) seeds of wheat using a linear pH gradient. Protein extraction and two-dimensional gel analysis were performed as described before<sup>3</sup>. All experiments were performed with three independent biological replicates.

**Table S1. Fold changes in the expression of probesets corresponding to proteins regulated by imbibition in both dormant and after-ripened seeds.**

| Protein spot | Probeset ID          | D-24/D-0 | AR-24/AR-C | UniProt Desc                                                                                                |
|--------------|----------------------|----------|------------|-------------------------------------------------------------------------------------------------------------|
| c1           | Ta.1137.1.S1_at      | -1.03    | -1.32      | Soluble starch synthase 1, chloroplastic/amyloplastic n=7 Tax=Oryza sativa RepID=SSY1_ORYSJ                 |
| c1           | Ta.55.1.S1_x_at      | 1.06     | 1.08       | Starch synthase II n=8 Tax=Triticeae RepID=Q8H1Y7_HORVD                                                     |
| c1           | Ta.55.2.S1_x_at      | 1.26     | -1.04      | Starch synthase (Fragment) n=1 Tax=Triticum aestivum RepID=O24398_WHEAT                                     |
| c1           | Ta.55.2.S1_a_at      | 1.33     | 1.16       | Starch synthase II n=8 Tax=Triticeae RepID=Q8H1Y7_HORVD                                                     |
| c1           | Ta.55.2.S1_at        | 1.36     | -1.00      | Starch synthase (Fragment) n=1 Tax=Triticum aestivum RepID=O24398_WHEAT                                     |
| c1           | Ta.24114.6.S1_s_at   | -1.48    | -1.43      | Granule-bound starch synthase 1, chloroplastic/amyloplastic n=29 Tax=Triticeae RepID=SSG1_WHEAT             |
| c1           | Ta.24114.3.S1_a_at   | -2.15    | -2.06      | Granule-bound starch synthase 1, chloroplastic/amyloplastic n=29 Tax=Triticeae RepID=SSG1_WHEAT             |
| c1           | Ta.24114.3.S1_at     | -1.05    | -1.01      | Granule-bound starch synthase 1, chloroplastic/amyloplastic n=29 Tax=Triticeae RepID=SSG1_WHEAT             |
| c1           | Ta.24114.2.S1_x_at   | -2.59    | -2.26      | Granule-bound starch synthase 1, chloroplastic/amyloplastic n=29 Tax=Triticeae RepID=SSG1_WHEAT             |
| c1           | Ta.238.1.S1_at       | -2.70    | -5.74      | Granule-bound starch synthase 1b, chloroplastic/amyloplastic (Fragment) n=2 Tax=Triticeae RepID=SSG1B_HORVU |
| c1           | Ta.2795.1.S1_a_at    | -1.59    | -1.55      | Granule-bound starch synthase n=2 Tax=Triticum aestivum RepID=Q9XEN9_WHEAT                                  |
| c2           | Ta.24114.6.S1_s_at   | -1.48    | -1.43      | Granule-bound starch synthase 1, chloroplastic/amyloplastic n=29 Tax=Triticeae RepID=SSG1_WHEAT             |
| c2           | Ta.24114.3.S1_a_at   | -2.15    | -2.06      | Granule-bound starch synthase 1, chloroplastic/amyloplastic n=29 Tax=Triticeae RepID=SSG1_WHEAT             |
| c2           | Ta.24114.3.S1_at     | -1.05    | -1.01      | Granule-bound starch synthase 1, chloroplastic/amyloplastic n=29 Tax=Triticeae RepID=SSG1_WHEAT             |
| c2           | Ta.24114.2.S1_x_at   | -2.59    | -2.26      | Granule-bound starch synthase 1, chloroplastic/amyloplastic n=29 Tax=Triticeae RepID=SSG1_WHEAT             |
| c2           | Ta.2795.1.S1_a_at    | -1.59    | -1.55      | Granule-bound starch synthase n=2 Tax=Triticum aestivum RepID=Q9XEN9_WHEAT                                  |
| c2           | Ta.238.1.S1_at       | -2.70    | -5.74      | Granule-bound starch synthase 1b, chloroplastic/amyloplastic (Fragment) n=2 Tax=Triticeae RepID=SSG1B_HORVU |
| c2           | Ta.55.1.S1_x_at      | 1.06     | 1.08       | Starch synthase II n=8 Tax=Triticeae RepID=Q8H1Y7_HORVD                                                     |
| c2           | Ta.55.2.S1_x_at      | 1.26     | -1.04      | Starch synthase (Fragment) n=1 Tax=Triticum aestivum RepID=O24398_WHEAT                                     |
| c2           | Ta.55.2.S1_a_at      | 1.33     | 1.16       | Starch synthase II n=8 Tax=Triticeae RepID=Q8H1Y7_HORVD                                                     |
| c2           | Ta.55.2.S1_at        | 1.36     | -1.00      | Starch synthase (Fragment) n=1 Tax=Triticum aestivum RepID=O24398_WHEAT                                     |
| c2           | Ta.1137.1.S1_at      | -1.03    | -1.32      | Soluble starch synthase 1, chloroplastic/amyloplastic n=7 Tax=Oryza sativa RepID=SSY1_ORYSJ                 |
| c3           | Ta.3.1.S1_at         | -1.14    | -1.26      | Beta-amylase n=2 Tax=Triticeae RepID=AMYB_WHEAT                                                             |
| c3           | Ta.27780.1.S1_at     | -7.97    | -6.90      | Beta-amylase n=12 Tax=Hordeum vulgare RepID=AMYB_HORVU                                                      |
| c3           | Ta.27780.1.S1_x_at   | -6.27    | -5.52      | Beta-amylase n=12 Tax=Hordeum vulgare RepID=AMYB_HORVU                                                      |
| c3           | Ta.137.1.S1_at       | -1.10    | -1.23      | Beta-amylase (Fragment) n=1 Tax=Triticum aestivum RepID=Q9ZR48_WHEAT                                        |
| c3           | Ta.4494.1.S1_x_at    | -3.71    | -8.39      | Beta-amylase n=3 Tax=Oryza sativa RepID=Q10RZ1_ORYSJ                                                        |
| c3           | Ta.4494.1.S1_at      | -4.04    | -8.61      | Beta-amylase n=3 Tax=Oryza sativa RepID=Q10RZ1_ORYSJ                                                        |
| c3           | Ta.1062.1.S1_at      | 1.10     | -1.66      | Beta-amylase n=1 Tax=Zea mays RepID=B6SVZ0_MAIZE                                                            |
| c3           | TaAffx.68872.1.S1_at | -1.39    | -1.61      | Putative uncharacterized protein Sb01g028700 n=1 Tax=Sorghum bicolor RepID=C5WRG3_SORBI                     |
| c3           | Ta.27780.2.A1_x_at   | -10.60   | -10.47     | Beta-amylase (Fragment) n=1 Tax=Secale cereale RepID=AMYB_SECCE                                             |
| c3           | Ta.27780.2.A1_a_at   | -10.48   | -10.72     | Beta-amylase n=12 Tax=Hordeum vulgare RepID=AMYB_HORVU                                                      |
| c4           | Ta.137.1.S1_at       | -1.10    | -1.23      | Beta-amylase (Fragment) n=1 Tax=Triticum aestivum RepID=Q9ZR48_WHEAT                                        |
| c4           | Ta.4494.1.S1_x_at    | -3.71    | -8.39      | Beta-amylase n=3 Tax=Oryza sativa RepID=Q10RZ1_ORYSJ                                                        |
| c4           | Ta.4494.1.S1_at      | -4.04    | -8.61      | Beta-amylase n=3 Tax=Oryza sativa RepID=Q10RZ1_ORYSJ                                                        |
| c4           | Ta.1062.1.S1_at      | 1.10     | -1.66      | Beta-amylase n=1 Tax=Zea mays RepID=B6SVZ0_MAIZE                                                            |
| c4           | TaAffx.68872.1.S1_at | -1.39    | -1.61      | Putative uncharacterized protein Sb01g028700 n=1 Tax=Sorghum bicolor RepID=C5WRG3_SORBI                     |
| c4           | Ta.3.1.S1_at         | -1.14    | -1.26      | Beta-amylase n=2 Tax=Triticeae RepID=AMYB_WHEAT                                                             |
| c4           | Ta.27780.1.S1_x_at   | -6.27    | -5.52      | Beta-amylase n=12 Tax=Hordeum vulgare RepID=AMYB_HORVU                                                      |
| c4           | Ta.27780.1.S1_at     | -7.97    | -6.90      | Beta-amylase n=12 Tax=Hordeum vulgare RepID=AMYB_HORVU                                                      |
| c5           | Ta.3.1.S1_at         | -1.14    | -1.26      | Beta-amylase n=2 Tax=Triticeae RepID=AMYB_WHEAT                                                             |

|     |                       |        |        |                                                                                         |
|-----|-----------------------|--------|--------|-----------------------------------------------------------------------------------------|
| c5  | Ta.27780.1.S1_at      | -7.97  | -6.90  | Beta-amylase n=12 Tax=Hordeum vulgare RepID=AMYB_HORVU                                  |
| c5  | Ta.27780.1.S1_x_at    | -6.27  | -5.52  | Beta-amylase n=12 Tax=Hordeum vulgare RepID=AMYB_HORVU                                  |
| c5  | Ta.137.1.S1_at        | -1.10  | -1.23  | Beta-amylase (Fragment) n=1 Tax=Triticum aestivum RepID=Q9ZR48_WHEAT                    |
| c5  | Ta.4494.1.S1_x_at     | -3.71  | -8.39  | Beta-amylase n=3 Tax=Oryza sativa RepID=Q10RZ1_ORYSJ                                    |
| c5  | Ta.4494.1.S1_at       | -4.04  | -8.61  | Beta-amylase n=3 Tax=Oryza sativa RepID=Q10RZ1_ORYSJ                                    |
| c5  | Ta.1062.1.S1_at       | 1.10   | -1.66  | Beta-amylase n=1 Tax=Zea mays RepID=B6SVZ0_MAIZE                                        |
| c5  | TaAffx.68872.1.S1_at  | -1.39  | -1.61  | Putative uncharacterized protein Sb01g028700 n=1 Tax=Sorghum bicolor RepID=C5WRG3_SORBI |
| c5  | Ta.27780.2.A1_x_at    | -10.60 | -10.47 | Beta-amylase (Fragment) n=1 Tax=Secale cereale RepID=AMYB_SECCE                         |
| c5  | Ta.27780.2.A1_a_at    | -10.48 | -10.72 | Beta-amylase n=12 Tax=Hordeum vulgare RepID=AMYB_HORVU                                  |
| c6  | Ta.23807.4.S1_x_at    | 1.56   | 1.52   | 70 kDa heat shock protein n=16 Tax=Embryophyta RepID=Q9LHA8_ARATH                       |
| c6  | Ta.23807.4.S1_s_at    | 1.60   | 1.46   | 70 kDa heat shock protein n=16 Tax=Embryophyta RepID=Q9LHA8_ARATH                       |
| c6  | Ta.24515.1.S1_at      | -2.04  | -3.33  | 70 kDa heat shock protein n=16 Tax=Embryophyta RepID=Q9LHA8_ARATH                       |
| c6  | Ta.23807.7.S1_x_at    | 1.50   | 1.34   | 70 kDa heat shock protein n=16 Tax=Embryophyta RepID=Q9LHA8_ARATH                       |
| c6  | Ta.23807.7.S1_at      | 1.47   | 1.21   | 70 kDa heat shock protein n=16 Tax=Embryophyta RepID=Q9LHA8_ARATH                       |
| c6  | Ta.10259.1.S1_at      | -1.53  | -1.11  | 70 kDa heat shock protein n=16 Tax=Embryophyta RepID=Q9LHA8_ARATH                       |
| c6  | Ta.23807.6.A1_x_at    | 1.42   | 1.52   | 70 kDa heat shock protein n=16 Tax=Embryophyta RepID=Q9LHA8_ARATH                       |
| c6  | Ta.23807.6.A1_at      | 1.37   | 1.38   | 70 kDa heat shock protein n=16 Tax=Embryophyta RepID=Q9LHA8_ARATH                       |
| c6  | Ta.21335.1.S1_a_at    | -1.16  | 2.09   | Luminal-binding protein 2 n=10 Tax=Magnoliophyta RepID=BIP2_MAIZE                       |
| c6  | Ta.21335.1.S1_at      | -1.20  | 2.83   | Luminal-binding protein 2 n=10 Tax=Magnoliophyta RepID=BIP2_MAIZE                       |
| c6  | Ta.28220.1.S1_at      | 1.52   | 1.12   | Predicted protein n=4 Tax=core eudicotyledons RepID=B9N9W5_POPTR                        |
| c6  | TaAffx.112076.1.S1_at | -1.09  | -1.52  | Heat shock protein 70 (Fragment) n=3 Tax=Magnoliophyta RepID=Q5EBY7_MAIZE               |
| c6  | Ta.15522.1.S1_at      | 1.04   | 1.01   | Putative uncharacterized protein n=1 Tax=Oryza sativa Indica Group RepID=A2Y5F9_ORYSI   |
| c6  | Ta.21335.2.A1_x_at    | -1.66  | 3.16   | Luminal-binding protein 2 n=10 Tax=Magnoliophyta RepID=BIP2_MAIZE                       |
| c6  | Ta.522.1.S1_at        | -2.11  | -1.49  | Putative uncharacterized protein n=1 Tax=Oryza sativa Japonica Group RepID=B9FK56_ORYSJ |
| c6  | Ta.2706.3.S1_at       | 1.46   | 1.76   | Os01g0180800 protein n=1 Tax=Oryza sativa Japonica Group RepID=Q9AQZ5_ORYSJ             |
| c6  | Ta.15522.2.S1_x_at    | -1.31  | -1.51  | Putative uncharacterized protein Sb06g014400 n=1 Tax=Sorghum bicolor RepID=C5YEW8_SORBI |
| c7  | Ta.1548.2.S1_x_at     | 1.06   | 1.08   | Putative elongation factor 1 beta n=1 Tax=Hordeum vulgare RepID=Q9M3U8_HORVU            |
| c8  | Ta.1548.2.S1_x_at     | 1.06   | 1.08   | Putative elongation factor 1 beta n=1 Tax=Hordeum vulgare RepID=Q9M3U8_HORVU            |
| c8  | Ta.26753.1.A1_at      | -1.23  | -1.12  | Elongation factor 1-delta 1 n=4 Tax=Andropogoneae RepID=B4FNT1_MAIZE                    |
| c9  | Ta.1548.2.S1_x_at     | 1.06   | 1.08   | Putative elongation factor 1 beta n=1 Tax=Hordeum vulgare RepID=Q9M3U8_HORVU            |
| c10 | no hit                |        |        |                                                                                         |
| c11 | Ta.1314.1.S1_s_at     | -4.59  | -4.83  | Serpin-Z1B n=5 Tax=Triticum aestivum RepID=SPZ1B_WHEAT                                  |
| c11 | Ta.1314.1.S1_at       | -4.61  | -6.31  | Serpin-Z1B n=5 Tax=Triticum aestivum RepID=SPZ1B_WHEAT                                  |
| c11 | Ta.117.1.S1_at        | -8.65  | -5.43  | Serpin-Z2B n=1 Tax=Triticum aestivum RepID=SPZ2B_WHEAT                                  |
| c11 | Ta.118.1.S1_at        | -4.43  | -4.87  | Serpin-Z1B n=5 Tax=Triticum aestivum RepID=SPZ1B_WHEAT                                  |
| c11 | Ta.9259.1.S1_at       | -1.45  | -1.15  | Serpin-ZX n=1 Tax=Hordeum vulgare RepID=SPZX_HORVU                                      |
| c11 | Ta.9999.1.S1_at       | -7.35  | -5.71  | Serpin 2 n=2 Tax=Triticum aestivum RepID=COLF31_WHEAT                                   |
| c11 | Ta.119.1.S1_x_at      | -1.80  | -1.55  | Serpin-Z2A n=1 Tax=Triticum aestivum RepID=SPZ2A_WHEAT                                  |
| c11 | Ta.26273.1.A1_at      | -2.13  | -5.51  | Serpin-ZX n=1 Tax=Hordeum vulgare RepID=SPZX_HORVU                                      |
| c12 | Ta.7031.3.S1_a_at     | -2.68  | -4.13  | Os03g0332400 protein n=2 Tax=Oryza sativa RepID=Q10LW8_ORYSJ                            |
| c12 | TaAffx.112982.1.S1_at | -1.11  | -1.34  | Hydroxyacylglutathione hydrolase n=3 Tax=Andropogoneae RepID=B6T2Y2_MAIZE               |

**Table S1.** Relative changes in expression of probesets representing proteins downregulated during imbibition in both dormant and after-ripened seeds. Conversion of the proteins into their corresponding probesets was performed as described previously<sup>3</sup>. Expression data of the probesets was obtained from our previously reported transcriptomic data (GEO accession number GSE32409) analysed as described before<sup>2</sup>. Probesets with  $\geq 2$ -fold change ( $P \leq 0.05$ ) were considered as differentially expressed.
